# Supplementary material for: Mosquitoes (Diptera: Culicidae) in the Dark—Highlighting the Importance of Genetically Identifying Mosquito Populations in Subterranean Environments of Central Europe
Source: MDPI journal article supplement (doi:10.3390/pathogens10091090), 2021-08-26
Supplement: s1 [file s1]

Table S1; Mosquitoes sampled in subterranean sites in Luxembourg (T=transition zone, D=dark zone, E=entrance)

| ID           | taxon                                    | gender | sampling date | sampling site                            | artificial / natural | cave region |
|--------------|------------------------------------------|--------|---------------|------------------------------------------|----------------------|-------------|
| 131113-119   | <i>Cx. pipiens</i><br>f. <i>pipiens</i>  | f      | 13.11.2013    | Dolomitgrouf Kelsbaach, Machtum          | artificial           | T           |
| 150404-46    | <i>Cx.torrentium</i>                     | f      | 04.04.2015    | Keltenhiel, Müllerthal                   | natural              | T           |
| 150404-47    | <i>Cx. pipiens</i><br>f. <i>pipiens</i>  | f      | 04.04.2015    | Keltenhiel, Müllerthal                   | natural              | T           |
| 080504-31    | <i>Cx. pipiens</i><br>f. <i>pipiens</i>  | f      | 04.05.2008    | Grotte de la Vierge, Müllerthal          | natural              | D           |
| 070817-233   | <i>Cx. pipiens</i><br>f. <i>pipiens</i>  | f      | 17.08.2007    | Schlöff, Mersch                          | artificial           | T           |
| 080315-249   | <i>Cx.torrentium</i>                     | f      | 15.03.2008    | Schlöff, Mersch                          | artificial           | T           |
| 081226-76    | <i>Cx. pipiens</i><br>f. <i>pipiens</i>  | f      | 26.12.2008    | Minière Laangebiërg Diddeleng, Dudelange | artificial           | T           |
| 081226-85    | <i>Cx.torrentium</i>                     | f      | 26.12.2008    | Minière Laangebiërg Diddeleng, Dudelange | artificial           | T           |
| 090820-113   | <i>Cx.torrentium</i>                     | f      | 20.08.2009    | Fort Berlaumont, Luxembourg              | artificial           | T           |
| 090820-138   | <i>Cx.torrentium</i>                     | f      | 20.08.2009    | Fort Berlaumont, Luxembourg              | artificial           | T           |
| 090820-142   | <i>Cx.torrentium</i>                     | f      | 20.08.2009    | Fort Berlaumont, Luxembourg              | artificial           | D           |
| 111031-407   | <i>Cx. pipiens</i><br>f. <i>pipiens</i>  | f      | 31.10.2011    | Fort Vauban, Luxembourg                  | artificial           | T           |
| 111031-406   | <i>Cx.torrentium</i>                     | f      | 31.10.2011    | Fort Vauban, Luxembourg                  | artificial           | T           |
| 111031-411   | <i>Cx. pipiens</i><br>f. <i>pipiens</i>  | f      | 31.10.2011    | Fort Vauban, Luxembourg                  | artificial           | D           |
| 111031-414   | <i>Cx. pipiens</i><br>f. <i>pipiens</i>  | f      | 31.10.2011    | Fort Vauban, Luxembourg                  | artificial           | D           |
| 111031-416   | <i>Cx. pipiens</i><br>f. <i>pipiens</i>  | f      | 31.10.2011    | Fort Vauban, Luxembourg                  | artificial           | D           |
| 111031-450   | <i>Cx. pipiens</i><br>f. <i>pipiens</i>  | f      | 31.10.2011    | Fort Royal, Luxembourg                   | artificial           | D           |
| 111031-453   | <i>Cx. pipiens</i><br>f. <i>pipiens</i>  | f      | 31.10.2011    | Fort Royal, Luxembourg                   | artificial           | D           |
| 111031-457   | <i>Cx. pipiens</i><br>f. <i>pipiens</i>  | f      | 31.10.2001    | Fort Royal, Luxembourg                   | artificial           | D           |
| 120428-146   | <i>Cx. pipiens</i><br>f. <i>molestus</i> | f      | 28.04.2012    | Fort Royal, Luxembourg                   | artificial           | D           |
| 120428-153   | <i>Cx. pipiens</i><br>f. <i>pipiens</i>  | f      | 28.04.2012    | Fort Royal, Luxembourg                   | artificial           | T           |
| 130107-11    | <i>Cx. pipiens</i><br>f. <i>pipiens</i>  | f      | 07.01.2013    | Grassebiërgtunnel, Bech                  | artificial           | T           |
| 130107-19    | <i>Cx. pipiens</i><br>f. <i>pipiens</i>  | f      | 07.01.2013    | Grassebiërgtunnel, Bech                  | artificial           | T           |
| 130107-22    | <i>Cx. pipiens</i><br>f. <i>pipiens</i>  | f      | 07.01.2013    | Grassebiërgtunnel, Bech,                 | artificial           | T           |
| 130107-48    | <i>Cx. pipiens</i><br>f. <i>pipiens</i>  | f      | 07.01.2013    | Grassebiërgtunnel, Bech                  | artificial           | T           |
| 130107-51    | <i>Cx. pipiens</i><br>f. <i>pipiens</i>  | f      | 07.01.2013    | Grassebiërgtunnel, Bech                  | artificial           | T           |
| 130816-119_a | <i>Cx. pipiens</i><br>f. <i>pipiens</i>  | f      | 16.08.2013    | Fort Rubamprez, Luxembourg               | artificial           | E           |
| 130816-119_b | <i>Cx. pipiens</i><br>f. <i>pipiens</i>  | f      | 16.08.2013    | Fort Rubamprez, Luxembourg               | artificial           | E           |
| 130816-125_a | <i>Cx. pipiens</i><br>f. <i>pipiens</i>  | f      | 16.08.2013    | Fort Rubamprez, Luxembourg               | artificial           | T           |

|              |                                         |   |            |                                                        |            |   |
|--------------|-----------------------------------------|---|------------|--------------------------------------------------------|------------|---|
| 130816-125_b | <i>Cx. pipiens</i><br>f. <i>pipiens</i> | f | 16.08.2013 | Fort Rubamprez, Luxembourg                             | artificial | T |
| 130816-125_c | <i>Cx. pipiens</i><br>f. <i>pipiens</i> | f | 16.08.2013 | Fort Rubamprez, Luxembourg                             | artificial | T |
| 130816-135_a | <i>Cx. torrentium</i>                   | f | 16.08.2013 | Fort Rubamprez, Luxembourg                             | artificial | T |
| 130510-98    | <i>Cx. pipiens</i><br>f. <i>pipiens</i> | f | 10.05.2013 | Verbindungsgang Rahnplateau – Grundscheule, Luxembourg | artificial | D |
| 131210-12    | <i>Cx. pipiens</i><br>f. <i>pipiens</i> | f | 10.12.2013 | Fort du Moulin, Luxembourg                             | artificial | T |
| 131210-13    | <i>Cx. pipiens</i><br>f. <i>pipiens</i> | f | 10.12.2013 | Fort du Moulin, Luxembourg                             | artificial | T |
| 131210-14    | <i>Cx. pipiens</i><br>f. <i>pipiens</i> | f | 10.12.2013 | Fort du Moulin, Luxembourg                             | artificial | T |
| 131210-15    | <i>Cx. pipiens</i><br>f. <i>pipiens</i> | f | 10.12.2013 | Fort du Moulin, Luxembourg                             | artificial | T |
| 131210-16    | <i>Cx. pipiens</i><br>f. <i>pipiens</i> | f | 10.12.2013 | Fort du Moulin, Luxembourg                             | artificial | T |
| 131114-04    | <i>Cx. pipiens</i><br>f. <i>pipiens</i> | f | 14.11.2013 | Keller unter Burgmauer, Echternach                     | artificial | T |
| 131114-05    | <i>Cx. pipiens</i><br>f. <i>pipiens</i> | f | 14.11.2013 | Keller unter Burgmauer, Echternach                     | artificial | T |
| 141117-16    | <i>Cx. pipiens</i><br>f. <i>pipiens</i> | f | 17.11.2014 | Keller Assa, Luxembourg                                | artificial | T |
| 141211-06    | <i>Cx. pipiens</i><br>f. <i>pipiens</i> | f | 11.12.2014 | Höhle 2, Luxemburg                                     | natural    | T |
| 141211-07    | <i>Cx. pipiens</i><br>f. <i>pipiens</i> | f | 11.12.2014 | Höhle 2, Luxemburg                                     | natural    | T |
| 141211-09    | <i>Cx. pipiens</i><br>f. <i>pipiens</i> | f | 11.12.2014 | Höhle 2, Luxemburg                                     | natural    | T |
| 141211-10    | <i>Cx. pipiens</i><br>f. <i>pipiens</i> | f | 11.12.2014 | Höhle 2, Luxemburg                                     | natural    | T |
| 141211-19    | <i>Cx. pipiens</i><br>f. <i>pipiens</i> | f | 11.12.2014 | Höhle 3, Luxemburg                                     | natural    | T |
| 150417-70    | <i>Cx. pipiens</i><br>f. <i>pipiens</i> | f | 17.04.2015 | Fort Lambert, Luxembourg                               | artificial | D |
| 150417-96    | <i>Cx. pipiens</i><br>f. <i>pipiens</i> | f | 17.04.2015 | Fort Lambert, Luxembourg                               | artificial | D |
| 150417-33    | <i>Cx. pipiens</i><br>f. <i>pipiens</i> | f | 17.04.2015 | Fort Lambert, Luxembourg                               | artificial | T |
| 150417-34    | <i>Cx. pipiens</i><br>f. <i>pipiens</i> | f | 17.04.2015 | Fort Lambert, Luxembourg                               | artificial | T |
| 150417-69    | <i>Cx. pipiens</i><br>f. <i>pipiens</i> | f | 17.04.2015 | Fort Lambert, Luxembourg                               | artificial | D |
| 130926-24    | <i>Cx. torrentium</i>                   | f | 26.09.2013 | Gipsminn bei Girsterklaus,                             | artificial | T |
| 130816-45    | <i>Cx. torrentium</i>                   | f | 16.08.2013 | Bahntunnel, Junglinster                                | artificial | T |
| 130816-47    | <i>Cx. torrentium</i>                   | f | 16.08.2013 | Bahntunnel, Junglinster                                | artificial | T |
| 130816-48    | <i>Cx. torrentium</i>                   | f | 16.08.2013 | Bahntunnel, Junglinster                                | artificial | T |
| 130817-42    | <i>Cx. torrentium</i>                   | f | 17.08.2013 | Bahntunnel, Junglinster                                | artificial | T |
| 130817-65    | <i>Cx. torrentium</i>                   | f | 17.08.2013 | Bahntunnel, Junglinster                                | artificial | T |
| 131112-06    | <i>Cx. pipiens</i><br>f. <i>pipiens</i> | f | 12.11.2013 | Galerie de Bockholtzermillen, Goesdorf                 | artificial | T |
| 131112-07    | <i>Cx. pipiens</i><br>f. <i>pipiens</i> | f | 12.11.2013 | Galerie de Bockholtzermillen, Goesdorf                 | artificial | T |
| 131112-08    | <i>Cx. pipiens</i><br>f. <i>pipiens</i> | f | 12.11.2013 | Galerie de Bockholtzermillen, Goesdorf                 | artificial | T |
| 131112-09    | <i>Cx. pipiens</i><br>f. <i>pipiens</i> | f | 12.11.2013 | Galerie de Bockholtzermillen, Goesdorf                 | artificial | T |

|              |                                         |   |            |                                           |            |   |
|--------------|-----------------------------------------|---|------------|-------------------------------------------|------------|---|
| 121202-119   | Cx. <i>torrentium</i>                   | f | 02.12.2012 | Antimonminn, Goesdorf                     | artificial | T |
| 121202-125_a | Cx. <i>pipiens</i><br>f. <i>pipiens</i> | f | 02.12.2012 | Antimonminn, Goesdorf                     | artificial | T |
| 121202-138   | Cx. <i>torrentium</i>                   | f | 02.12.2012 | Antimonminn, Goesdorf                     | artificial | D |
| 121202-145   | Cx. <i>torrentium</i>                   | f | 02.12.2012 | Antimonminn, Goesdorf                     | artificial | D |
| 100327-253   | Cx. <i>torrentium</i>                   | f | 27.03.2010 | Schiefergrouf vu Päre, Perlé              | artificial | T |
| 100327-254   | Cx. <i>torrentium</i>                   | f | 27.03.2010 | Schiefergrouf vu Päre, Perlé              | artificial | T |
| 100327-255   | Cx. <i>torrentium</i>                   | f | 27.03.2010 | Schiefergrouf vu Päre, Perlé              | artificial | T |
| 100327-265   | Cx. <i>pipiens</i><br>f. <i>pipiens</i> | f | 27.03.2010 | Schiefergrouf vu Päre, Perlé              | artificial | D |
| 101106-177   | Cx. <i>torrentium</i>                   | f | 06.11.2010 | Minière Weltschegronnd II, Rumelange      | artificial | E |
| 101106-183   | Cx. <i>pipiens</i><br>f. <i>pipiens</i> | f | 06.11.2010 | Minière Weltschegronnd II, Rumelange      | artificial | T |
| 101231-19    | Cx. <i>torrentium</i>                   | f | 31.12.2010 | Minière Weltschegronnd II, Rumelange      | artificial | T |
| 101231-26    | Cx. <i>pipiens</i><br>f. <i>pipiens</i> | f | 31.12.2010 | Minière Weltschegronnd II, Rumelange      | artificial | T |
| 080314-18    | Cx. <i>pipiens</i><br>f. <i>pipiens</i> | f | 14.03.2008 | SME-Tunnel, Rumelange                     | artificial | T |
| 140328-118   | Cx. <i>pipiens</i><br>f. <i>pipiens</i> | f | 28.03.2014 | SME-Tunnel, Rumelange                     | artificial | T |
| 101107-202   | Cx. <i>torrentium</i>                   | f | 07.11.2010 | Minière Laange Gronn XII, Rumelange       | artificial | T |
| 101107-208   | Cx. <i>torrentium</i>                   | f | 07.11.2010 | Minière Laange Gronn XII, Rumelange       | artificial | T |
| 101231-46    | Cx. <i>torrentium</i>                   | f | 31.12.2010 | Minière Laange Gronn XII, Rumelange       | artificial | D |
| 140417-06    | Cx. <i>pipiens</i><br>f. <i>pipiens</i> | f | 17.04.2014 | Minière Reschelerkopp, Rumelange          | artificial | E |
| 141227-14    | Cx. <i>torrentium</i>                   | f | 27.12.2014 | Minière Reschelerkopp, Rumelange          | artificial | T |
| 141227-15    | Cx. <i>pipiens</i><br>f. <i>pipiens</i> | f | 27.12.2014 | Minière Reschelerkopp, Rumelange          | artificial | T |
| 141227-18    | Cx. <i>pipiens</i><br>f. <i>pipiens</i> | f | 27.12.2014 | Minière Reschelerkopp, Rumelange          | artificial | T |
| 141227-27    | Cx. <i>pipiens</i><br>f. <i>pipiens</i> | f | 27.12.2014 | Minière Reschelerkopp, Rumelange          | artificial | D |
| 141230-20    | Cx. <i>pipiens</i><br>f. <i>pipiens</i> | f | 30.12.2014 | Minière Laange Gronn III, Rumelange       | artificial | T |
| 141230-77    | Cx. <i>pipiens</i><br>f. <i>pipiens</i> | f | 30.12.2014 | Minière Laange Gronn III, Rumelange       | artificial | D |
| 141230-78    | Cx. <i>pipiens</i><br>f. <i>pipiens</i> | f | 30.12.2014 | Minière Laange Gronn III, Rumelange       | artificial | D |
| 140327-09    | Cx. <i>torrentium</i>                   | f | 37.03.2014 | Schifergrouf vu Schläif II, Niederwampach | artificial | T |
| 140327-35    | Cx. <i>pipiens</i><br>f. <i>pipiens</i> | f | 27.03.2014 | Schifergrouf vu Schläif II, Niederwampach | artificial | T |
| 140327-121   | Cx. <i>torrentium</i>                   | f | 27.03.2014 | Tussen-Tunnel I, Niederwampach            | artificial | T |
| 140327-135   | Cx. <i>pipiens</i><br>f. <i>pipiens</i> | f | 27.03.2014 | Tussen-Tunnel I, Niederwampach            | artificial | T |
| 131214-41    | Cx. <i>pipiens</i><br>f. <i>pipiens</i> | f | 14.12.2013 | Tunnel Huldange, Weiswampach              | artificial | T |
| 131214-42    | Cx. <i>pipiens</i><br>f. <i>pipiens</i> | f | 14.12.2013 | Tunnel Huldange, Weiswampach              | artificial | T |
| 131214-44    | Cx. <i>pipiens</i><br>f. <i>pipiens</i> | f | 14.12.2013 | Tunnel Huldange, Weiswampach              | artificial | D |

|              |                                         |   |            |                                         |            |   |
|--------------|-----------------------------------------|---|------------|-----------------------------------------|------------|---|
| 131214-45    | Cx. <i>torrentium</i>                   | f | 14.12.2013 | Tunnel Huldange, Weiswampach            | artificial | D |
| 131214-46    | Cx. <i>torrentium</i>                   | f | 14.12.2013 | Tunnel Huldange, Weiswampach            | artificial | D |
| 100206-358   | Cx. <i>pipiens</i><br>f. <i>pipiens</i> | f | 06.02.2010 | Kofferminn Stolzebuerg, Stolzembourg    | artificial | D |
| 100206-360   | Cx. <i>torrentium</i>                   | f | 06.02.2010 | Kofferminn Stolzebuerg, Stolzembourg    | artificial | D |
| 100206-257_a | Cx. <i>torrentium</i>                   | f | 06.02.2010 | Kofferminn Stolzebuerg II, Stolzembourg | artificial | T |
| 100206-292   | Cx. <i>torrentium</i>                   | f | 06.02.2010 | Tunnel vun Habscht, Hobscheid           | artificial | D |
| 110122-149a  | Cx. <i>pipiens</i><br>f. <i>pipiens</i> | f | 22.01.2011 | Gipsminn, Bettendorf                    | artificial | T |
| 110122-157   | Cx. <i>pipiens</i><br>f. <i>pipiens</i> | f | 22.01.2011 | Gipsminn, Bettendorf                    | artificial | T |
| 110122-167   | Cx. <i>pipiens</i><br>f. <i>pipiens</i> | f | 22.01.2001 | Gipsminn, Bettendorf                    | artificial | T |
| 110122-173   | Cx. <i>torrentium</i>                   | f | 22.01.2011 | Gipsminn, Bettendorf                    | artificial | T |
| 110909-620   | Cx. <i>torrentium</i>                   | f | 09.09.2011 | Minn vun Asselbuer, Asselborn           | artificial | T |
| 111227-03    | Cx. <i>pipiens</i><br>f. <i>pipiens</i> | f | 27.12.2011 | Minn vun Asselbuer, Asselborn           | artificial | T |
| 111030-408   | Cx. <i>pipiens</i><br>f. <i>pipiens</i> | f | 30.10.2011 | Minière Doihl, Rodange                  | artificial | T |
| 111030-422   | Cx. <i>pipiens</i><br>f. <i>pipiens</i> | f | 30.12.2001 | Minière Doihl, Rodange                  | artificial | T |
| 140328-18    | Cx. <i>pipiens</i><br>f. <i>pipiens</i> | f | 28.03.2014 | Minière de la Crosnière, Lasauvage      | artificial | T |
| 140328-19    | Cx. <i>pipiens</i><br>f. <i>pipiens</i> | f | 28.03.2014 | Minière de la Crosnière, Lasauvage      | artificial | T |
| 140328-27    | Cx. <i>pipiens</i><br>f. <i>pipiens</i> | f | 28.03.2014 | Minière de la Crosnière, Lasauvage      | artificial | T |
| 140328-34    | Cx. <i>pipiens</i><br>f. <i>pipiens</i> | f | 28.03.2014 | Minière de la Crosnière, Lasauvage      | artificial | T |
| 140329-105   | Cx. <i>pipiens</i><br>f. <i>pipiens</i> | f | 29.03.2014 | Minière Saintignon, Lasauvage           | artificial | T |
| 140329-109   | Cx. <i>pipiens</i><br>f. <i>pipiens</i> | f | 29.03.2014 | Minière Saintignon, Lasauvage           | artificial | T |
| 140329-110   | Cx. <i>pipiens</i><br>f. <i>pipiens</i> | f | 29.03.2014 | Minière Saintignon, Lasauvage           | artificial | T |
| 140329-113   | Cx. <i>pipiens</i><br>f. <i>pipiens</i> | f | 29.03.2014 | Minière Saintignon, Lasauvage           | artificial | T |
| 140329-11    | Cx. <i>pipiens</i><br>f. <i>pipiens</i> | f | 29.03.2014 | Tunnel Lasauvage, Lasauvage             | artificial | T |
| 140329-13    | Cx. <i>pipiens</i><br>f. <i>pipiens</i> | f | 29.03.2014 | Tunnel Lasauvage, Lasauvage             | artificial | T |
| 140329-42    | Cx. <i>pipiens</i><br>f. <i>pipiens</i> | f | 29.03.2014 | Pulverkammer, Lasauvage                 | artificial | E |
| 111228-55    | Cx. <i>pipiens</i><br>f. <i>pipiens</i> | f | 28.12.2011 | Wichtelcherslay, Hunnebur               | natural    | D |
| 120318-40    | Cx. <i>pipiens</i><br>f. <i>pipiens</i> | f | 18.03.2012 | Wichtelcherslay, Hunnebur               | natural    | D |
| 120730-183   | Cx. <i>pipiens</i><br>f. <i>pipiens</i> | f | 30.07.2012 | Lower dolomite mine, Wasserbillig       | artificial | E |
| 120730-199   | Cx. <i>pipiens</i><br>f. <i>pipiens</i> | f | 30.07.2012 | Lower dolomite mine, Wasserbillig       | artificial | T |
| 131113-100   | Cx. <i>pipiens</i><br>f. <i>pipiens</i> | f | 13.11.2013 | Upper dolomite mine, Wasserbillig       | artificial | T |
| 131113-101   | Cx. <i>pipiens</i><br>f. <i>pipiens</i> | f | 13.11.2013 | Upper dolomite mine, Wasserbillig       | artificial | T |
| 131113-102   | Cx. <i>pipiens</i><br>f. <i>pipiens</i> | f | 13.11.2013 | Upper dolomite mine, Wasserbillig       | artificial | T |

|            |                                          |   |            |                                    |            |   |
|------------|------------------------------------------|---|------------|------------------------------------|------------|---|
| 131212-131 | <i>Cx. torrentium</i>                    | f | 12.12.2013 | Déiwepötz, Consdorf                | natural    | D |
| 131212-134 | <i>Cx. pipiens</i><br>f. <i>pipiens</i>  | f | 12.12.2013 | Déiwepötz, Consdorf                | natural    | D |
| 131212-123 | <i>Cx. pipiens</i><br>f. <i>pipiens</i>  | f | 12.12.2013 | Déiwepötz, Consdorf                | natural    | D |
| 130309-144 | <i>Cx. pipiens</i><br>f. <i>molestus</i> | f | 09.03.2013 | Trou du Bivouak, Consdorf          | natural    | T |
| 131212-73  | <i>Cx. pipiens</i><br>f. <i>pipiens</i>  | f | 12.12.2013 | Trou du Bivouak, Consdorf          | natural    | T |
| 131212-74  | <i>Cx. pipiens</i><br>f. <i>pipiens</i>  | f | 12.12.2013 | Trou du Bivouak, Consdorf          | natural    | T |
| 130816-98  | <i>Cx. pipiens</i><br>f. <i>pipiens</i>  | f | 16.08.2013 | Kuelscheier, Consdorf              | natural    | T |
| 131212-148 | <i>Cx. pipiens</i><br>f. <i>pipiens</i>  | f | 12.12.2013 | Kuelscheier, Consdorf              | natural    | T |
| 131212-153 | <i>Cx. pipiens</i><br>f. <i>pipiens</i>  | f | 12.12.2013 | Kuelscheier, Consdorf              | natural    | D |
| 130816-108 | <i>Cx. pipiens</i><br>f. <i>pipiens</i>  | f | 16.08.2013 | Trou Hélène, Consdorf              | natural    | E |
| 131212-89  | <i>Cx. pipiens</i><br>f. <i>pipiens</i>  | f | 12.12.2013 | Trou Hélène, Consdorf              | natural    | T |
| 130817-03  | <i>Cx. pipiens</i><br>f. <i>pipiens</i>  | f | 17.08.2013 | Minière Lalangebiert, Schiffflange | artificial | T |
| 131205-04  | <i>Cx. pipiens</i><br>f. <i>pipiens</i>  | f | 05.12.2013 | Cellar, Echternach                 | artificial | - |
| 131205-05  | <i>Cx. pipiens</i><br>f. <i>pipiens</i>  | f | 05.12.2013 | Cellar, Echternach                 | artificial | - |
| 131205-15  | <i>Cx. pipiens</i><br>f. <i>pipiens</i>  | f | 05.12.2013 | Cellar, Echternach                 | artificial | - |
| 131212-04  | <i>Cx. pipiens</i><br>f. <i>pipiens</i>  | f | 12.12.2013 | Cave Chateau, Schoenfels           | artificial | T |
| 131212-40  | <i>Cx. pipiens</i><br>f. <i>pipiens</i>  | f | 12.12.2013 | Cave Chateau, Schoenfels           | artificial | T |
| 131212-43  | <i>Cx. pipiens</i><br>f. <i>pipiens</i>  | f | 12.12.2013 | Cave Chateau, Schoenfels           | artificial | D |
| 131212-44  | <i>Cx. pipiens</i><br>f. <i>pipiens</i>  | f | 12.12.2013 | Cave Chateau, Schoenfels           | artificial | D |
| 131214-12  | <i>Cx. pipiens</i><br>f. <i>pipiens</i>  | f | 14.12.2013 | Ardoisière, Merkholtz              | artificial |   |
| 140308-116 | <i>Cx. pipiens</i><br>f. <i>pipiens</i>  | f | 08.03.2014 | Eisebunns tunnel, Fouhren          | artificial | T |
| 140308-118 | <i>Cx. pipiens</i><br>f. <i>pipiens</i>  | f | 08.03.2014 | Eisebunns tunnel, Fouhren          | artificial | T |
| 150321-46  | <i>Cx. pipiens</i><br>f. <i>pipiens</i>  | f | 21.03.2015 | Eisebunns tunnel, Fouhren          | artificial | T |
| 150321-52  | <i>Cx. pipiens</i><br>f. <i>pipiens</i>  | f | 21.03.2015 | Eisebunns tunnel, Fouhren          | artificial | T |
| 150321-53  | <i>Cx. pipiens</i><br>f. <i>pipiens</i>  | f | 21.03.2015 | Eisebunns tunnel, Fouhren          | artificial | D |
| 140330-50  | <i>Cx. pipiens</i><br>f. <i>pipiens</i>  | f | 30.03.2014 | Tunnel bei Doihl, Rodange          | artificial | T |
| 140330-73  | <i>Cx. pipiens</i><br>f. <i>pipiens</i>  | f | 30.03.2014 | Tunnel bei Doihl, Rodange          | artificial | T |
| 150404-06  | <i>Cx. pipiens</i><br>f. <i>pipiens</i>  | f | 04.04.2015 | Hell, Berdorf                      | natural    | T |
| 150404-28  | <i>Cx. torrentium</i>                    | f | 04.04.2015 | Hell, Berdorf                      | natural    | T |
| 150404-38  | <i>Cx. pipiens</i><br>f. <i>pipiens</i>  | f | 04.04.2015 | Hell, Berdorf                      | natural    | D |
| 150404-40  | <i>Cx. pipiens</i><br>f. <i>pipiens</i>  | f | 04.04.2015 | Hell, Berdorf                      | natural    | D |
| 131112-40  | <i>Cx. pipiens</i><br>f. <i>pipiens</i>  | f | 12.11.2013 | Galerie Harelerbaach, Harlange     | artificial | T |

|           |                                         |   |            |                                |            |   |
|-----------|-----------------------------------------|---|------------|--------------------------------|------------|---|
| 131112-45 | <i>Cx. pipiens</i><br><i>f. pipiens</i> | f | 12.11.2013 | Galerie Harelerbaach, Harlange | artificial | T |
| 131112-52 | <i>Cx.</i><br><i>torrentium</i>         | f | 12.11.2013 | Galerie Harelerbaach, Harlange | artificial | T |
