# Supplementary material for: Mosquitoes (Diptera: Culicidae) in the Dark—Highlighting the Importance of Genetically Identifying Mosquito Populations in Subterranean Environments of Central Europe
Source: MDPI journal article supplement (doi:10.3390/pathogens10091090), 2021-08-26
Supplement: s1 [file s1]

Table S2; Mosquitoes sampled in subterranean sites in Germany (T=transition zone, D=dark zone)

| ID        | taxon                         | gender | sampling date           | sampling site                 | artificial / natural/touristic | cave region |
|-----------|-------------------------------|--------|-------------------------|-------------------------------|--------------------------------|-------------|
| SubCul001 | <i>Cx. pipiens f. pipiens</i> | f      | 07.04.2018              | Swabian Jura, Gussmannhöhle   | natural, touristic             | D           |
| SubCul002 | <i>Cx. torrentium</i>         | f      | 07.04.2018              | Swabian Jura, Gussmannhöhle   | natural, touristic             | D           |
| SubCul003 | <i>Cx. pipiens f. pipiens</i> | f      | 07.04.2018              | Swabian Jura, Gussmannhöhle   | natural, touristic             | D           |
| SubCul004 | <i>Cx. torrentium</i>         | f      | 07.04.2018              | Swabian Jura, Gussmannhöhle   | natural, touristic             | D           |
| SubCul006 | <i>Cx. pipiens f. pipiens</i> | f      | 31.10.2017 - 07.04.2018 | Swabian Jura, Krebssteinhöhle | natural                        | D           |
| SubCul007 | <i>Cx. pipiens f. pipiens</i> | f      | 28.04.2018              | Süntel Mts., Schillathöhle    | natural, touristic             | T           |
| SubCul008 | <i>Cx. pipiens f. pipiens</i> | f      | 28.04.2018              | Süntel Mts., Schillathöhle    | natural, touristic             | T           |
| SubCul009 | <i>Cx. pipiens f. pipiens</i> | f      | 28.04.2018              | Süntel Mts., Schillathöhle    | natural, touristic             | T           |
| SubCul010 | <i>Cx. pipiens f. pipiens</i> | f      | 28.04.2018              | Süntel Mts., Schillathöhle    | natural, touristic             | T           |
| SubCul011 | <i>Cx. pipiens f. pipiens</i> | f      | 07.04.2018              | Swabian Jura, Gussmannhöhle   | natural, touristic             | T           |
| SubCul012 | <i>Cx. torrentium</i>         | f      | 07.04.2018              | Swabian Jura, Gussmannhöhle   | natural, touristic             | T           |
| SubCul013 | <i>Cx. torrentium</i>         | f      | 07.04.2018              | Swabian Jura, Gussmannhöhle   | natural, touristic             | T           |
| SubCul014 | <i>Cx. pipiens f. pipiens</i> | f      | 07.04.2018              | Swabian Jura, Gussmannhöhle   | natural, touristic             | T           |
| SubCul015 | <i>Cx. pipiens f. pipiens</i> | f      | 07.04.2018              | Swabian Jura, Gussmannhöhle   | natural, touristic             | T           |
| SubCul016 | <i>Cx. torrentium</i>         | f      | 07.04.2018              | Swabian Jura, Gussmannhöhle   | natural, touristic             | T           |
| SubCul017 | <i>Cx. torrentium</i>         | f      | 07.04.2018              | Swabian Jura, Gussmannhöhle   | natural, touristic             | T           |
| SubCul018 | <i>Cx. pipiens f. pipiens</i> | f      | 07.04.2018              | Swabian Jura, Wolfshöhle      | natural                        | D           |
| SubCul019 | <i>Cx. torrentium</i>         | f      | 07.04.2018              | Swabian Jura, Wolfshöhle      | natural                        | D           |
| SubCul020 | <i>Cx. pipiens f. pipiens</i> | f      | 07.04.2018              | Swabian Jura, Wolfshöhle      | natural                        | D           |
| SubCul021 | <i>Cx. pipiens f. pipiens</i> | f      | 07.04.2018              | Swabian Jura, Wolfshöhle      | natural                        | D           |
| SubCul022 | <i>Cx. pipiens f. pipiens</i> | f      | 07.04.2018              | Swabian Jura, Wolfshöhle      | natural                        | D           |

|                  |                                                 |   |            |                                 |                    |   |
|------------------|-------------------------------------------------|---|------------|---------------------------------|--------------------|---|
| <b>SubCul028</b> | <i>Cx.<br/>pipiens f.<br/>pipiens</i>           | f | 07.04.2018 | Swabian Jura, Krebssteinhöhle   | natural            | D |
| <b>SubCul029</b> | <i>Cx.<br/>pipiens f.<br/>pipiens</i>           | f | 07.04.2018 | Swabian Jura, Krebssteinhöhle   | natural            | D |
| <b>SubCul030</b> | <i>Cx.<br/>pipiens f.<br/>pipiens</i>           | f | 07.04.2018 | Swabian Jura, Krebssteinhöhle   | natural            | D |
| <b>SubCul031</b> | <i>Cx.<br/>pipiens f.<br/>pipiens</i>           | f | 07.04.2018 | Swabian Jura, Gutenberger Höhle | natural, touristic | T |
| <b>SubCul032</b> | <i>Cx.<br/>pipiens f.<br/>pipiens</i>           | f | 07.04.2018 | Swabian Jura, Gutenberger Höhle | natural, touristic | T |
| <b>SubCul033</b> | <i>Cx.<br/>pipiens f.<br/>pipiens</i>           | f | 07.04.2018 | Swabian Jura, Gutenberger Höhle | natural, touristic | T |
| <b>SubCul034</b> | <i>Cx.<br/>pipiens f.<br/>pipiens</i>           | f | 07.04.2018 | Swabian Jura, Gutenberger Höhle | natural, touristic | T |
| <b>SubCul035</b> | <i>Cx.<br/>pipiens f.<br/>pipiens x<br/>mol</i> | f | 07.04.2018 | Swabian Jura, Gutenberger Höhle | natural, touristic | T |
| <b>SubCul036</b> | <i>Cx.<br/>pipiens f.<br/>pipiens</i>           | f | 07.04.2018 | Swabian Jura, Gutenberger Höhle | natural, touristic | T |
| <b>SubCul037</b> | <i>Cx.<br/>pipiens f.<br/>pipiens</i>           | f | 07.04.2018 | Swabian Jura, Krebssteinhöhle   | natural            | T |
| <b>SubCul038</b> | <i>Cx.<br/>pipiens f.<br/>pipiens</i>           | f | 07.04.2018 | Swabian Jura, Krebssteinhöhle   | natural            | T |
| <b>SubCul039</b> | <i>Cx.<br/>pipiens f.<br/>pipiens</i>           | f | 07.04.2018 | Swabian Jura, Krebssteinhöhle   | natural            | T |
| <b>SubCul040</b> | <i>Cx.<br/>torrentium</i>                       | f | 07.04.2018 | Swabian Jura, Krebssteinhöhle   | natural            | T |
| <b>SubCul041</b> | <i>Cx.<br/>torrentium</i>                       | f | 07.04.2018 | Swabian Jura, Krebssteinhöhle   | natural            | T |
| <b>SubCul042</b> | <i>Cx.<br/>pipiens f.<br/>pipiens</i>           | f | 07.04.2018 | Swabian Jura, Krebssteinhöhle   | natural            | T |
| <b>SubCul043</b> | <i>Cx.<br/>pipiens f.<br/>pipiens</i>           | f | 28.04.2018 | Süntel Mts., Riesenberghöhle    | natural            | D |
| <b>SubCul044</b> | <i>Cx.<br/>pipiens f.<br/>pipiens</i>           | f | 28.04.2018 | Süntel Mts., Riesenberghöhle    | natural            | D |
| <b>SubCul046</b> | <i>Cx.<br/>pipiens f.<br/>pipiens</i>           | f | 19.08.2017 | Süntel Mts., Riesenberghöhle    | natural            | T |
| <b>SubCul048</b> | <i>Cx.<br/>pipiens f.<br/>pipiens</i>           | f | 19.08.2017 | Süntel Mts., Riesenberghöhle    | natural            | T |
| <b>SubCul049</b> | <i>Cx.<br/>torrentium</i>                       | f | 19.08.2017 | Süntel Mts., Riesenberghöhle    | natural            | T |
| <b>SubCul050</b> | <i>Cx.<br/>torrentium</i>                       | f | 12.09.2017 | Harz Mts., Einhornhöhle         | natural, touristic | D |
| <b>SubCul051</b> | <i>Cx.<br/>pipiens f.<br/>pipiens</i>           | f | 12.09.2017 | Harz Mts., Einhornhöhle         | natural, touristic | D |

|                  |                                       |   |            |                                        |                    |   |
|------------------|---------------------------------------|---|------------|----------------------------------------|--------------------|---|
| <b>SubCul052</b> | <i>Cx.<br/>pipiens f.<br/>pipiens</i> | f | 12.09.2017 | Harz Mts., Einhornhöhle                | natural, touristic | D |
| <b>SubCul053</b> | <i>Cx.<br/>pipiens f.<br/>pipiens</i> | f | 12.09.2017 | Harz Mts., Einhornhöhle                | natural, touristic | D |
| <b>SubCul055</b> | <i>Cx.<br/>pipiens f.<br/>pipiens</i> | f | 30.07.2018 | Swabian Jura, Krebssteinhöhle          | natural            | T |
| <b>SubCul057</b> | <i>Cx.<br/>pipiens f.<br/>pipiens</i> | f | 12.09.2017 | Harz Mts., Einhornhöhle                | natural, touristic | T |
| <b>SubCul059</b> | <i>Cx.<br/>torrentium</i>             | f | 30.07.2018 | Swabian Jura, Wolfshöhle               | natural            | D |
| <b>SubCul060</b> | <i>Cx.<br/>torrentium</i>             | f | 20.09.2017 | Westerwald, Adventhöhle                | natural            | D |
| <b>SubCul061</b> | <i>Cx.<br/>pipiens f.<br/>pipiens</i> | f | 19.08.2017 | Süntel Mts., Schillathöhle             | natural, touristic | T |
| <b>SubCul063</b> | <i>Cx.<br/>pipiens f.<br/>pipiens</i> | f | 19.08.2017 | Süntel Mts., Schillathöhle             | natural, touristic | T |
| <b>SubCul064</b> | <i>Cx.<br/>pipiens f.<br/>pipiens</i> | f | 19.08.2017 | Süntel Mts., Schillathöhle             | natural, touristic | T |
| <b>SubCul065</b> | <i>Cx.<br/>torrentium</i>             | f | 20.09.2017 | Westerwald, Adventhöhle                | natural            | T |
| <b>SubCul066</b> | <i>Cx.<br/>pipiens f.<br/>mol</i>     | f | 20.09.2017 | Westerwald, Adventhöhle                | natural            | T |
| <b>SubCul067</b> | <i>Cx.<br/>torrentium</i>             | f | 12.09.2017 | Harz Mts., Weingartenloch              | natural            | D |
| <b>SubCul068</b> | <i>Cx.<br/>pipiens f.<br/>pipiens</i> | f | 12.09.2017 | Harz Mts., Weingartenloch              | natural            | D |
| <b>SubCul069</b> | <i>Cx.<br/>torrentium</i>             | f | 12.09.2017 | Harz Mts., Weingartenloch              | natural            | D |
| <b>SubCul070</b> | <i>Cx.<br/>torrentium</i>             | f | 12.09.2017 | Harz Mts., Weingartenloch              | natural            | D |
| <b>SubCul072</b> | <i>Cx.<br/>pipiens f.<br/>pipiens</i> | f | 12.09.2017 | Harz Mts., Weingartenloch              | natural            | D |
| <b>SubCul073</b> | <i>Cx.<br/>torrentium</i>             | f | 12.09.2017 | Harz Mts., Weingartenloch              | natural            | D |
| <b>SubCul074</b> | <i>Cx.<br/>torrentium</i>             | f | 12.09.2017 | Harz Mts., Weingartenloch              | natural            | D |
| <b>SubCul076</b> | <i>Cx.<br/>torrentium</i>             | f | 12.09.2017 | Harz Mts., Weingartenloch              | natural            | D |
| <b>SubCul077</b> | <i>Cx.<br/>torrentium</i>             | f | 12.09.2017 | Harz Mts., Weingartenloch              | natural            | D |
| <b>SubCul078</b> | <i>Cx.<br/>torrentium</i>             | f | 12.09.2017 | Harz Mts., Weingartenloch              | natural            | D |
| <b>SubCul080</b> | <i>Cx.<br/>pipiens f.<br/>pipiens</i> | f | 12.09.2017 | Harz Mts., Weingartenloch              | natural            | D |
| <b>SubCul081</b> | <i>Cx.<br/>torrentium</i>             | f | 12.09.2017 | Harz Mts., Weingartenloch              | natural            | D |
| <b>SubCul091</b> | <i>Cx.<br/>pipiens f.<br/>pipiens</i> | f | 30.07.2018 | Swabian Jura, Gussmannhöhle            | natural, touristic | T |
| <b>SubCul092</b> | <i>Cx.<br/>pipiens f.<br/>pipiens</i> | f | 09.10.2017 | Franconian Switzerland,<br>Mammuthöhle | natural            | D |

|                  |                                       |   |            |                                        |                    |   |
|------------------|---------------------------------------|---|------------|----------------------------------------|--------------------|---|
| <b>SubCul093</b> | <i>Cx.<br/>pipiens f.<br/>pipiens</i> | f | 09.10.2017 | Franconian Switzerland,<br>Mammuthöhle | natural            | D |
| <b>SubCul094</b> | <i>Cx.<br/>pipiens f.<br/>pipiens</i> | f | 09.10.2017 | Franconian Switzerland,<br>Mammuthöhle | natural            | D |
| <b>SubCul095</b> | <i>Cx.<br/>pipiens f.<br/>pipiens</i> | f | 14.10.2017 | Swabian Jura, Gussmannhöhle            | natural, touristic | D |
| <b>SubCul096</b> | <i>Cx.<br/>torrentium</i>             | f | 14.10.2017 | Swabian Jura, Gussmannhöhle            | natural, touristic | D |
| <b>SubCul097</b> | <i>Cx.<br/>pipiens f.<br/>pipiens</i> | f | 14.10.2017 | Swabian Jura, Gussmannhöhle            | natural, touristic | D |
| <b>SubCul098</b> | <i>Cx.<br/>pipiens f.<br/>pipiens</i> | f | 14.10.2017 | Swabian Jura, Gussmannhöhle            | natural, touristic | D |
| <b>SubCul100</b> | <i>Cx.<br/>pipiens f.<br/>pipiens</i> | f | 14.10.2017 | Swabian Jura, Gussmannhöhle            | natural, touristic | D |
| <b>SubCul101</b> | <i>Cx.<br/>pipiens f.<br/>pipiens</i> | f | 30.07.2018 | Swabian Jura, Krebssteinhöhle          | natural            | D |
| <b>SubCul102</b> | <i>Cx.<br/>pipiens f.<br/>pipiens</i> | f | 14.10.2017 | Swabian Jura, Gussmannhöhle            | natural, touristic | T |
| <b>SubCul103</b> | <i>Cx.<br/>pipiens f.<br/>pipiens</i> | f | 14.10.2017 | Swabian Jura, Gussmannhöhle            | natural, touristic | T |
| <b>SubCul104</b> | <i>Cx.<br/>pipiens f.<br/>pipiens</i> | f | 14.10.2017 | Swabian Jura, Gussmannhöhle            | natural, touristic | T |
| <b>SubCul105</b> | <i>Cx.<br/>pipiens f.<br/>pipiens</i> | f | 14.10.2017 | Swabian Jura, Gussmannhöhle            | natural, touristic | T |
| <b>SubCul106</b> | <i>Cx.<br/>torrentium</i>             | f | 14.10.2017 | Swabian Jura, Gussmannhöhle            | natural, touristic | T |
| <b>SubCul107</b> | <i>Cx.<br/>pipiens f.<br/>pipiens</i> | f | 14.10.2017 | Swabian Jura, Gussmannhöhle            | natural, touristic | T |
| <b>SubCul108</b> | <i>Cx.<br/>torrentium</i>             | f | 14.10.2017 | Swabian Jura, Gussmannhöhle            | natural, touristic | T |
| <b>SubCul109</b> | <i>Cx.<br/>pipiens f.<br/>pipiens</i> | f | 14.10.2017 | Swabian Jura, Gussmannhöhle            | natural, touristic | T |
| <b>SubCul110</b> | <i>Cx.<br/>pipiens f.<br/>pipiens</i> | f | 14.10.2017 | Swabian Jura, Gussmannhöhle            | natural, touristic | T |
| <b>SubCul111</b> | <i>Cx.<br/>pipiens f.<br/>pipiens</i> | f | 14.10.2017 | Swabian Jura, Gussmannhöhle            | natural, touristic | T |
| <b>SubCul112</b> | <i>Cx.<br/>pipiens f.<br/>pipiens</i> | f | 09.10.2017 | Franconian Switzerland,<br>Mammuthöhle | natural            | T |
| <b>SubCul114</b> | <i>Cx.<br/>torrentium</i>             | f | 09.10.2017 | Franconian Switzerland,<br>Mammuthöhle | natural            | T |
| <b>SubCul115</b> | <i>Cx.<br/>pipiens f.<br/>pipiens</i> | f | 14.10.2017 | Swabian Jura, Wolfshöhle               | natural            | D |
| <b>SubCul116</b> | <i>Cx.<br/>torrentium</i>             | f | 14.10.2017 | Swabian Jura, Wolfshöhle               | natural            | D |

|                  |                                                      |   |            |                               |                    |   |
|------------------|------------------------------------------------------|---|------------|-------------------------------|--------------------|---|
| <b>SubCul117</b> | <i>Cx.<br/>pipiens f.<br/>pipiens</i>                | f | 14.10.2017 | Swabian Jura, Wolfshöhle      | natural            | D |
| <b>SubCul118</b> | <i>Cx.<br/>pipiens f.<br/>pipiens</i>                | f | 14.10.2017 | Swabian Jura, Wolfshöhle      | natural            | D |
| <b>SubCul119</b> | <i>Cx.<br/>pipiens f.<br/>pipiens</i>                | f | 14.10.2017 | Swabian Jura, Wolfshöhle      | natural            | D |
| <b>SubCul120</b> | <i>Cx.<br/>torrentium</i>                            | f | 14.10.2017 | Swabian Jura, Wolfshöhle      | natural            | D |
| <b>SubCul121</b> | <i>Cx.<br/>pipiens f.<br/>pipiens</i>                | f | 14.10.2017 | Swabian Jura, Wolfshöhle      | natural            | T |
| <b>SubCul122</b> | <i>Cx.<br/>torrentium</i>                            | f | 14.10.2017 | Swabian Jura, Wolfshöhle      | natural            | T |
| <b>SubCul123</b> | <i>Cx.<br/>torrentium</i>                            | f | 14.10.2017 | Swabian Jura, Wolfshöhle      | natural            | T |
| <b>SubCul124</b> | <i>Cx.<br/>torrentium</i>                            | f | 14.10.2017 | Swabian Jura, Wolfshöhle      | natural            | T |
| <b>SubCul125</b> | <i>Cx.<br/>pipiens f.<br/>pipiens</i>                | f | 14.10.2017 | Swabian Jura, Wolfshöhle      | natural            | T |
| <b>SubCul127</b> | <i>Cx.<br/>pipiens f.<br/>pipiens</i>                | f | 14.10.2017 | Swabian Jura, Krebssteinhöhle | natural            | T |
| <b>SubCul128</b> | <i>Cx.<br/>pipiens f.<br/>pipiens</i>                | f | 14.10.2017 | Swabian Jura, Krebssteinhöhle | natural            | T |
| <b>SubCul129</b> | <i>Cx.<br/>pipiens f.<br/>pipiens</i>                | f | 14.10.2017 | Swabian Jura, Krebssteinhöhle | natural            | T |
| <b>SubCul130</b> | <i>Cx.<br/>torrentium</i>                            | f | 14.10.2017 | Swabian Jura, Krebssteinhöhle | natural            | T |
| <b>SubCul131</b> | <i>Cx.<br/>pipiens f.<br/>pipiens</i>                | f | 14.10.2017 | Swabian Jura, Krebssteinhöhle | natural            | T |
| <b>SubCul133</b> | <i>Cx.<br/>pipiens f.<br/>pipiens</i>                | f | 14.10.2017 | Swabian Jura, Krebssteinhöhle | natural            | T |
| <b>SubCul134</b> | <i>Cx.<br/>pipiens f.<br/>pipiens</i>                | f | 14.10.2017 | Swabian Jura, Krebssteinhöhle | natural            | T |
| <b>SubCul137</b> | <i>Cx.<br/>pipiens f.<br/>pipiens</i>                | f | 14.10.2017 | Swabian Jura, Gutenberghöhle  | natural, touristic | D |
| <b>SubCul139</b> | <i>Cx.<br/>pipiens f.<br/>pipiens</i>                | f | 14.10.2017 | Swabian Jura, Gutenberghöhle  | natural, touristic | D |
| <b>SubCul140</b> | <i>Cx.<br/>pipiens f.<br/>pipiens</i>                | f | 14.10.2017 | Swabian Jura, Gutenberghöhle  | natural, touristic | D |
| <b>SubCul141</b> | <i>Cx.<br/>torrentium</i>                            | f | 14.10.2017 | Swabian Jura, Gutenberghöhle  | natural, touristic | D |
| <b>SubCul144</b> | <i>Cx.<br/>pipiens f.<br/>pipiens X<br/>molestus</i> | f | 14.10.2017 | Swabian Jura, Gutenberghöhle  | natural, touristic | D |
| <b>SubCul145</b> | <i>Cx.<br/>pipiens f.<br/>pipiens</i>                | f | 14.10.2017 | Swabian Jura, Gutenberghöhle  | natural, touristic | D |
| <b>SubCul146</b> | <i>Cx.<br/>torrentium</i>                            | f | 14.10.2017 | Swabian Jura, Gutenberghöhle  | natural, touristic | D |

|                  |                                                      |   |            |                                        |                    |   |
|------------------|------------------------------------------------------|---|------------|----------------------------------------|--------------------|---|
| <b>SubCul147</b> | <i>Cx.<br/>pipiens f.<br/>pipiens</i>                | m | 14.10.2017 | Swabian Jura, Gutenberghöhle           | natural, touristic | T |
| <b>SubCul149</b> | <i>Cx.<br/>pipiens f.<br/>molestus</i>               | f | 14.10.2017 | Swabian Jura, Gutenberghöhle           | natural, touristic | T |
| <b>SubCul150</b> | <i>Cx.<br/>pipiens f.<br/>pipiens</i>                | f | 14.10.2017 | Swabian Jura, Gutenberghöhle           | natural, touristic | T |
| <b>SubCul151</b> | <i>Cx.<br/>pipiens f.<br/>pipiens</i>                | f | 14.10.2017 | Swabian Jura, Gutenberghöhle           | natural, touristic | T |
| <b>SubCul152</b> | <i>Cx.<br/>pipiens f.<br/>pipiens X<br/>molestus</i> | f | 14.10.2017 | Swabian Jura, Gutenberghöhle           | natural, touristic | T |
| <b>SubCul153</b> | <i>Cx.<br/>pipiens f.<br/>pipiens</i>                | f | 14.10.2017 | Swabian Jura, Gutenberghöhle           | natural, touristic | T |
| <b>SubCul154</b> | <i>Cx.<br/>pipiens f.<br/>pipiens</i>                | f | 14.10.2017 | Swabian Jura, Gutenberghöhle           | natural, touristic | T |
| <b>SubCul155</b> | <i>Cx.<br/>pipiens f.<br/>pipiens</i>                | f | 14.10.2017 | Swabian Jura, Gutenberghöhle           | natural, touristic | T |
| <b>SubCul156</b> | <i>Cx.<br/>pipiens f.<br/>pipiens</i>                | f | 14.10.2017 | Swabian Jura, Gutenberghöhle           | natural, touristic | T |
| <b>SubCul157</b> | <i>Cx.<br/>pipiens f.<br/>pipiens X<br/>molestus</i> | f | 14.10.2017 | Swabian Jura, Gutenberghöhle           | natural, touristic | T |
| <b>SubCul158</b> | <i>Cx.<br/>torrentium</i>                            | f | 07.10.2017 | Harz Mts., Weingartenloch              | natural            | T |
| <b>SubCul159</b> | <i>Cx.<br/>pipiens f.<br/>pipiens</i>                | f | 07.10.2017 | Harz Mts., Weingartenloch              | natural            | T |
| <b>SubCul160</b> | <i>Cx.<br/>pipiens f.<br/>pipiens</i>                | f | 07.10.2017 | Harz Mts., Weingartenloch              | natural            | T |
| <b>SubCul161</b> | <i>Cx.<br/>pipiens f.<br/>pipiens</i>                | f | 07.10.2017 | Harz Mts., Weingartenloch              | natural            | T |
| <b>SubCul162</b> | <i>Cx.<br/>pipiens f.<br/>pipiens</i>                | f | 07.10.2017 | Harz Mts., Weingartenloch              | natural            | T |
| <b>SubCul163</b> | <i>Cx.<br/>torrentium</i>                            | f | 07.10.2017 | Harz Mts., Weingartenloch              | natural            | T |
| <b>SubCul165</b> | <i>Cx.<br/>pipiens f.<br/>pipiens</i>                | f | 02.05.2018 | Franconian Switzerland,<br>Mammuthöhle | natural            | D |
| <b>SubCul168</b> | <i>Cx.<br/>torrentium</i>                            | f | 06.04.2018 | Westerwald, Adventhöhle                | natural            | T |
| <b>SubCul169</b> | <i>Cx.<br/>torrentium</i>                            | f | 06.04.2018 | Westerwald, Adventhöhle                | natural            | T |
| <b>SubCul170</b> | <i>Cx.<br/>torrentium</i>                            | f | 07.04.2018 | Swabian Jura, Wolfshöhle               | natural            | T |
| <b>SubCul171</b> | <i>Cx.<br/>torrentium</i>                            | f | 07.04.2018 | Swabian Jura, Wolfshöhle               | natural            | T |
| <b>SubCul172</b> | <i>Cx.<br/>pipiens f.<br/>pipiens</i>                | f | 07.04.2018 | Swabian Jura, Wolfshöhle               | natural            | T |

|                  |                                       |   |                            |                              |                    |   |
|------------------|---------------------------------------|---|----------------------------|------------------------------|--------------------|---|
| <b>SubCul173</b> | <i>Cx.<br/>pipiens f.<br/>pipiens</i> | f | 07.04.2018                 | Swabian Jura, Wolfshöhle     | natural            | T |
| <b>SubCul174</b> | <i>Cx.<br/>pipiens f.<br/>pipiens</i> | f | 07.04.2018                 | Swabian Jura, Wolfshöhle     | natural            | T |
| <b>SubCul175</b> | <i>Cx.<br/>torrentium</i>             | f | 07.04.2018                 | Swabian Jura, Wolfshöhle     | natural            | T |
| <b>SubCul176</b> | <i>Cx.<br/>torrentium</i>             | f | 07.04.2018                 | Swabian Jura, Wolfshöhle     | natural            | T |
| <b>SubCul177</b> | <i>Cx.<br/>torrentium</i>             | f | 07.04.2018                 | Swabian Jura, Wolfshöhle     | natural            | T |
| <b>SubCul178</b> | <i>Cx.<br/>pipiens f.<br/>pipiens</i> | f | 07.04.2018                 | Swabian Jura, Wolfshöhle     | natural            | T |
| <b>SubCul179</b> | <i>Cx.<br/>pipiens f.<br/>pipiens</i> | f | 20.04.2018                 | Harz Mts., Weingartenloch    | natural            | D |
| <b>SubCul180</b> | <i>Cx.<br/>pipiens f.<br/>pipiens</i> | f | 28.04.2018                 | Süntel Mts., Riesenberghöhle | natural            | T |
| <b>SubCul181</b> | <i>Cx.<br/>pipiens f.<br/>pipiens</i> | f | 28.04.2018                 | Süntel Mts., Riesenberghöhle | natural            | T |
| <b>SubCul182</b> | <i>Cx.<br/>pipiens f.<br/>pipiens</i> | f | 28.04.2018                 | Süntel Mts., Riesenberghöhle | natural            | T |
| <b>SubCul183</b> | <i>Cx.<br/>pipiens f.<br/>pipiens</i> | f | 28.04.2018                 | Süntel Mts., Riesenberghöhle | natural            | T |
| <b>SubCul184</b> | <i>Cx.<br/>pipiens f.<br/>pipiens</i> | f | 28.04.2018                 | Süntel Mts., Riesenberghöhle | natural            | T |
| <b>SubCul186</b> | <i>Cx.<br/>pipiens f.<br/>pipiens</i> | f | 28.04.2018                 | Süntel Mts., Riesenberghöhle | natural            | T |
| <b>SubCul187</b> | <i>Cx.<br/>pipiens f.<br/>pipiens</i> | f | 28.04.2018                 | Süntel Mts., Riesenberghöhle | natural            | T |
| <b>SubCul188</b> | <i>Cx.<br/>pipiens f.<br/>pipiens</i> | f | 31.10.2017 -<br>07.04.2018 | Swabian Jura, Wolfshöhle     | natural            | D |
| <b>SubCul189</b> | <i>Cx.<br/>pipiens f.<br/>pipiens</i> | m | 30.06.2018                 | Süntel Mts., Schillathöhle   | natural, touristic | T |
